# Supplementary material for: Full-coverage 1 km daily ambient PM 2.5 and O 3 concentrations of China in 2005–2017 based on multi-variable random forest model
Source: Copernicus journal article supplement (doi:10.5194/essd-2021-296), 2021-09-15
Supplement: Supplementary file [file essd-2021-296-AC1-supplement.pdf]

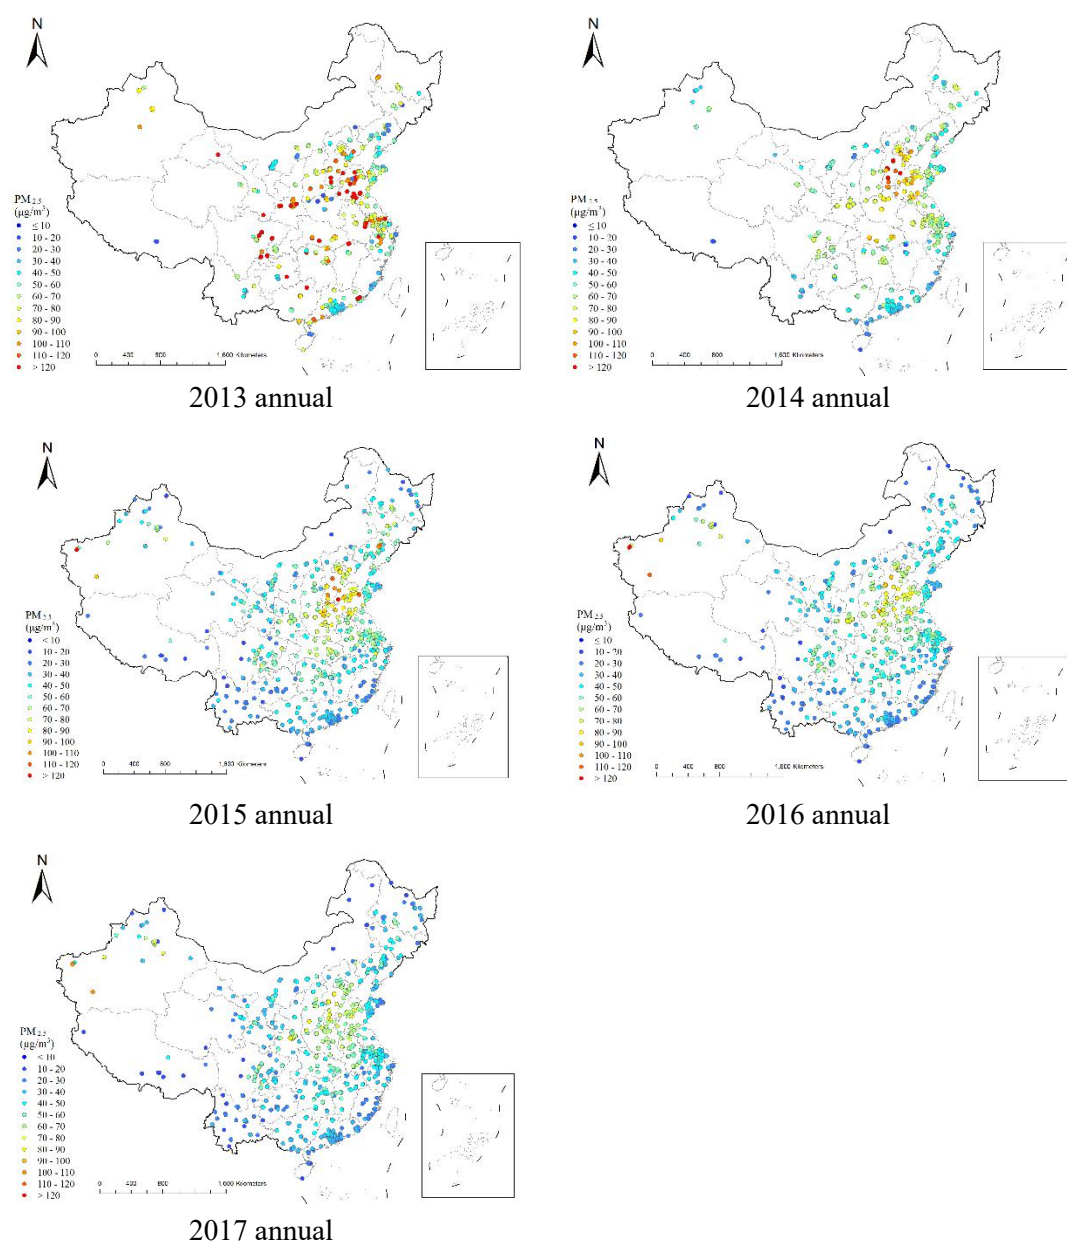

**Fig. 1** Station distribution in China and average ground monitoring concentration of PM<sub>2.5</sub> during 2013-2017

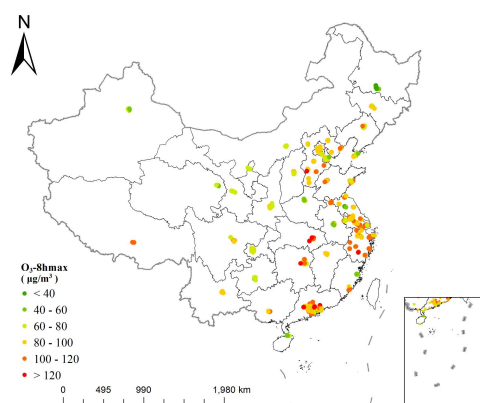

2013 annual

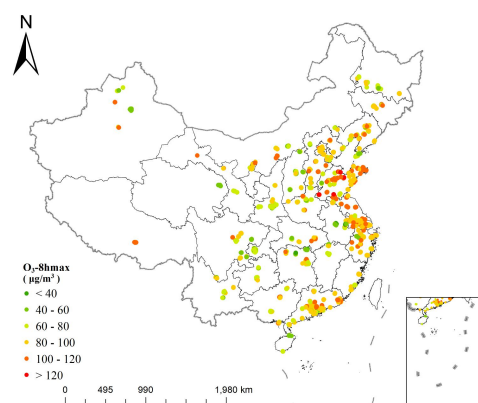

2014 annual

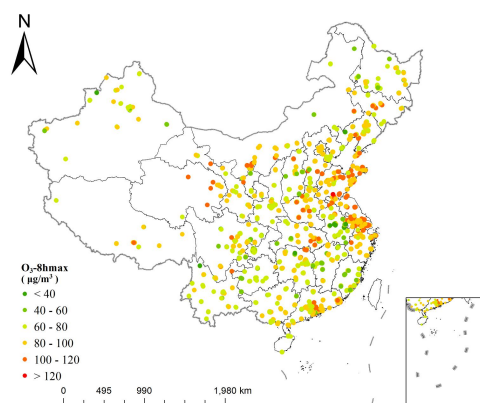

2015 annual

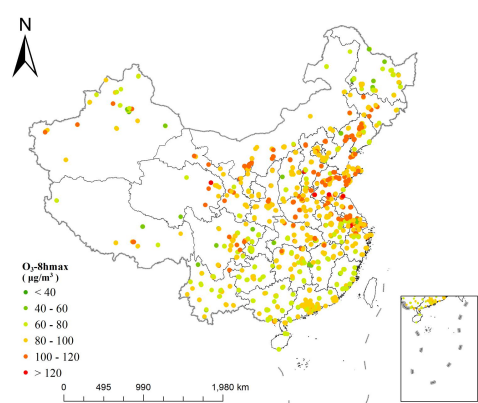

2016 annual

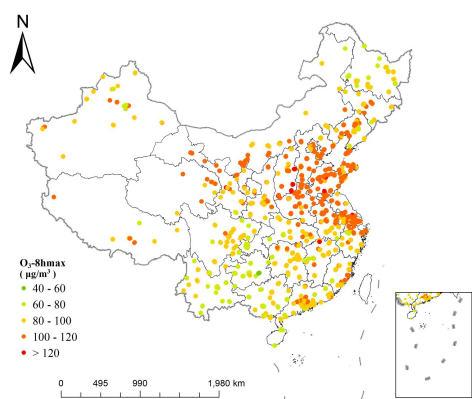

2017 annual

**Fig. 2 Station distribution in China and average ground monitoring concentration of  $O_3$ -8hmax during 2013-2017**

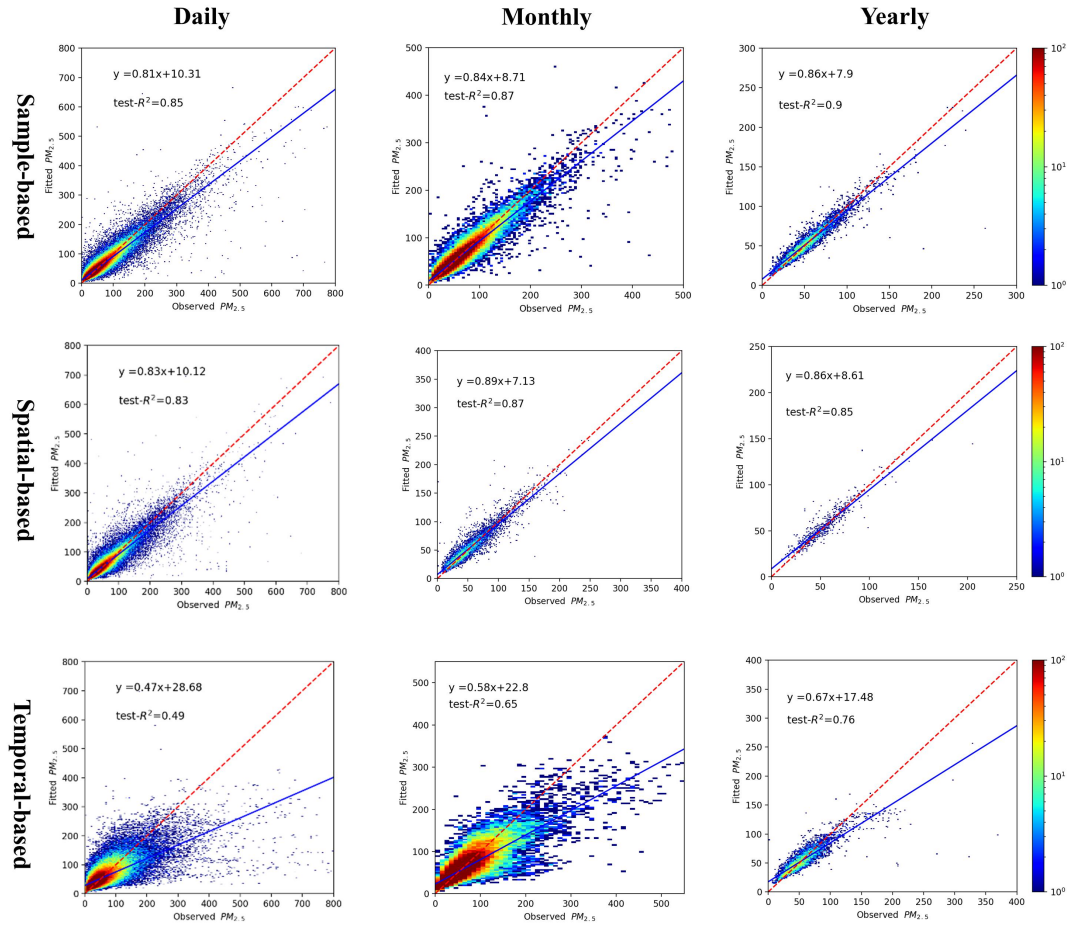

Fig. 3 The density plot of  $PM_{2.5}$  model

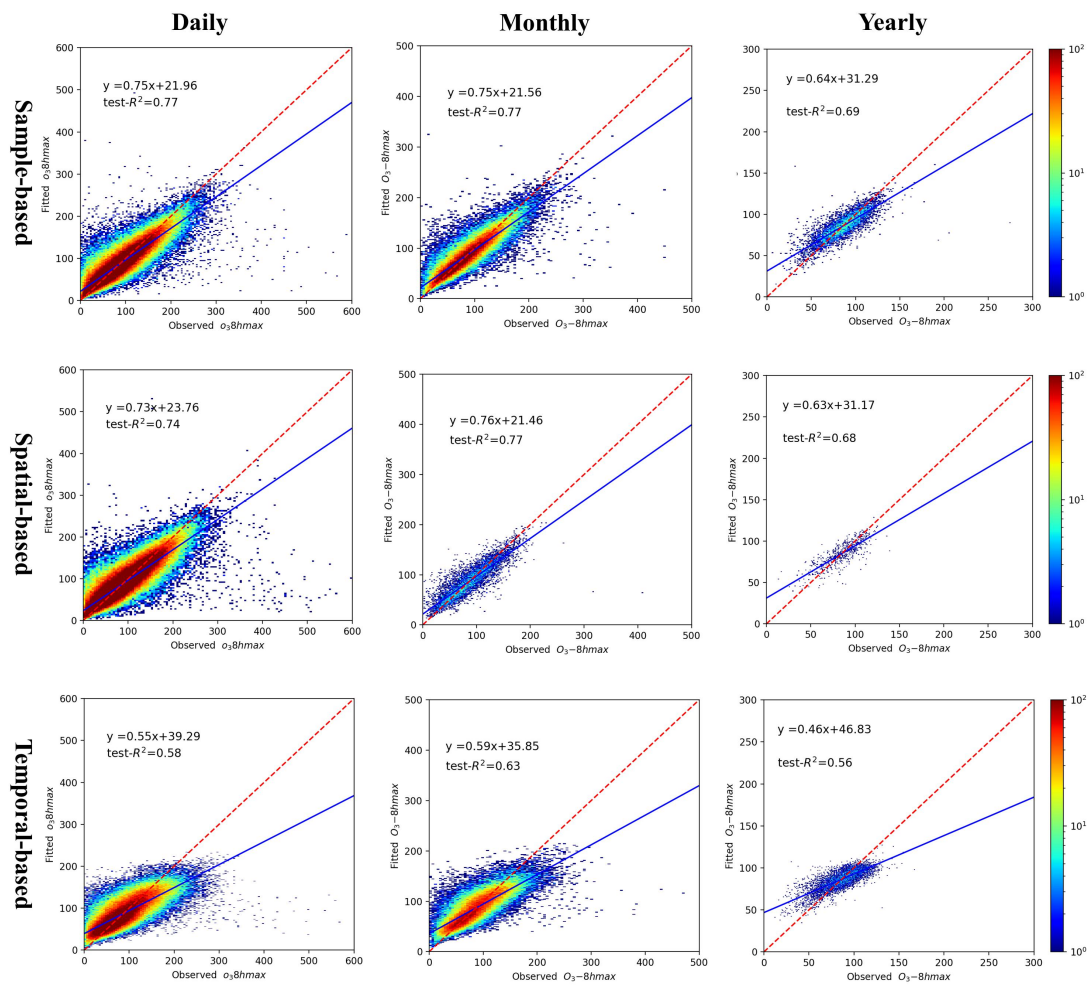

Fig. 4 The density plot of  $O_3-8hmax$  model

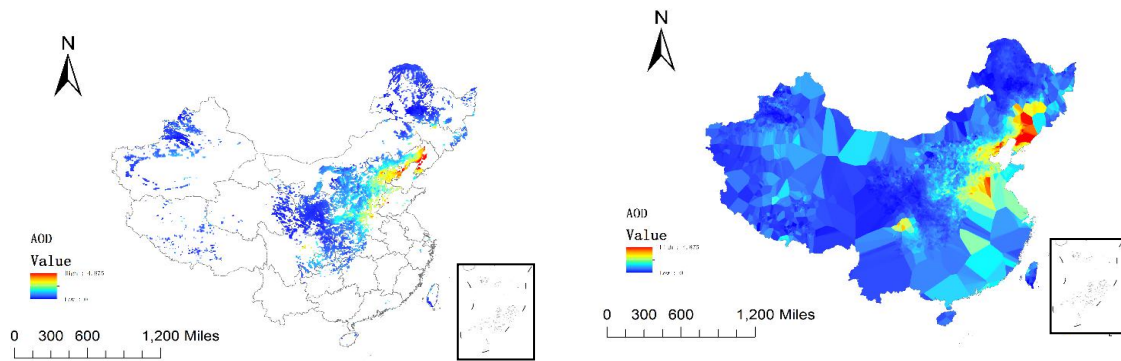

**Fig. 5 MYD04\_3K coverage in China and results after interpolation on January 1, 2017**

A) Beijing-Tianjing-Hebei region

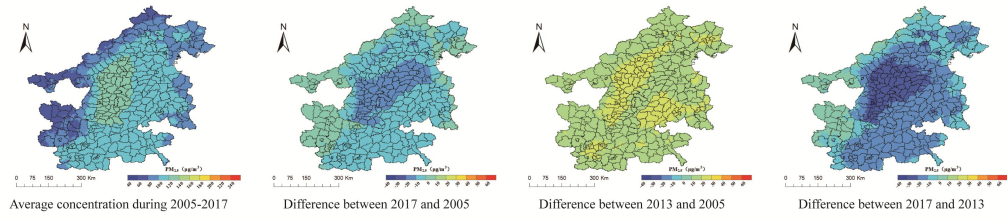

B) Yangtze River Delta

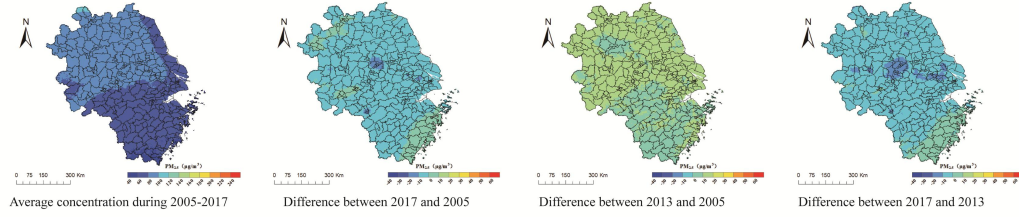

C) Pearl River Delta

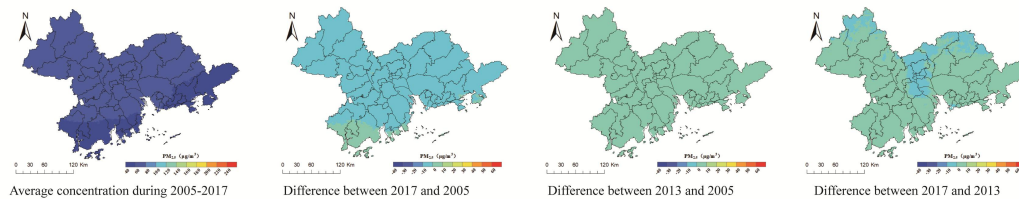

**Fig. 6 The Simulated annual mean and difference of PM<sub>2.5</sub> concentration in A) Beijing-Tianjin-Hebei region, B) Yangtze River Delta, and C) Pearl River Delta during 2005 to 2017**

A) Beijing-Tianjing-Hebei region

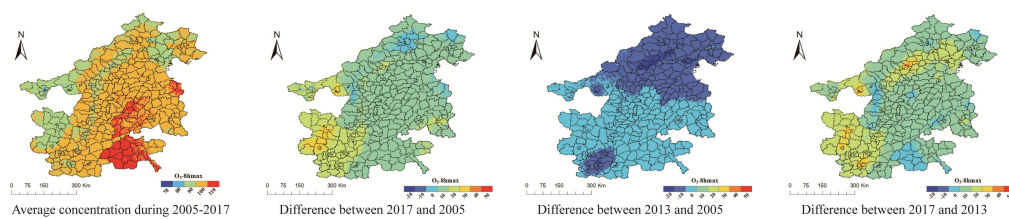

B) Yangtze River Delta

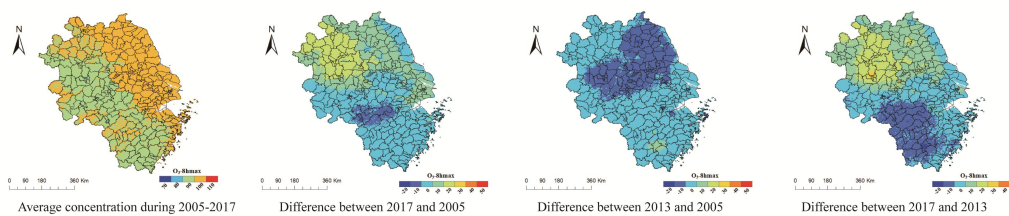

C) Pearl River Delta

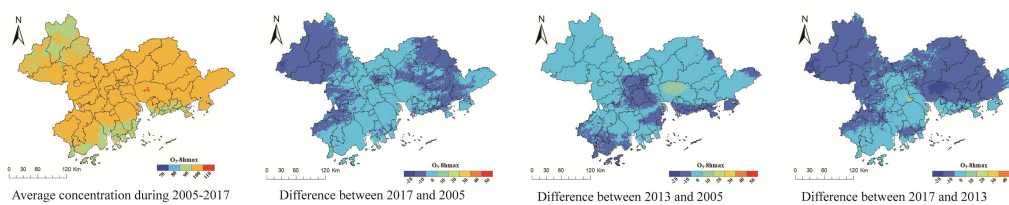

**Fig. 7 The Simulated annual mean and difference of  $O_3$ -8hmax concentration in A) Beijing-Tianjin-Hebei region, B) Yangtze River Delta, and C) Pearl River Delta during 2005 to 2017**

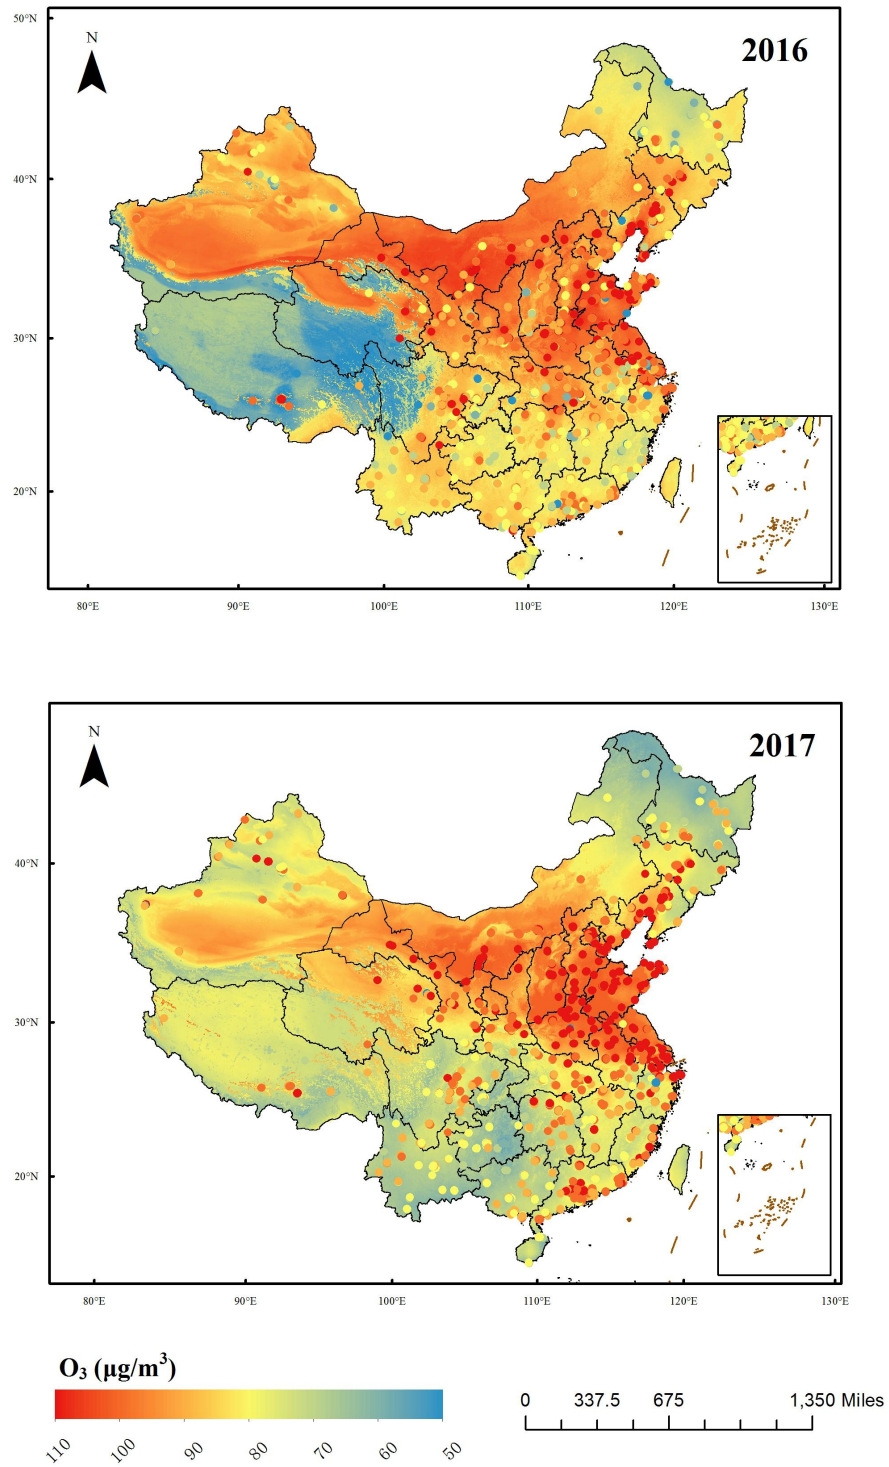

**Fig. 8** The modeling and monitoring  $O_3$ -8hmax concentrations in China in 2016 and 2017
